# Supplementary material
Source: publisher figshare collection journal article supplement (https://karger.figshare.com/ndownloader/files/39593824)
Supplement: Supplementary file 1 [file 39593824]

**Supplementary material 1. Patient characteristics**

|  | **Total**  **(n = 20)** | **WM**  **(n = 10)** | **Non-IgM-type LPL**  **(n = 10)** | **P-value** |
| --- | --- | --- | --- | --- |
| **Sample type, n (%)**  BMMNCs  PBMCs  BM FFPE samples  LN FFPE samples | 8 (40)  4 (20)  6 (30)  2 (10) | 5 (50)  1 (10)  2 (20)  2 (20) | 3 (30)  3 (30)  4 (40)  0 (0) | 0.24 |
| **Paraprotein type, n (%)**  IgM  IgG  IgG and IgM  IgA and IgM | 10 (50)  8 (40)  1 (5)  1 (5) | 10 (100)  0 (0)  0 (0)  0 (0) | 0 (0)  8 (80)  1 (10)  1 (10) | - |
| **Age, median (IQR)** | 65.5 (49.8-73) | 69.5 (51.8-72.8) | 62.5 (49-72.8) | 0.60 |
| **BM infiltration%, median (IQR)** | 14.7 (5.1 – 43.2) | 11.8 (5.3 – 15.9) | 34.4 (6.8 – 65.1) | 0.24 |
| **Sex, male/female** | 13/7 | 9/1 | 4/6 | 0.019 |

P-values were obtained by Mann-Whitney U test for continuous variables and Pearson's chi-squared test for categorical variables. BMMNCs, bone marrow mononuclear cells; PBMCs, peripheral blood mononuclear cells; BM, bone marrow; FFPE, formalin-fixed paraffin-embedded; LN, lymph node.
